# Supplementary material for: Members of Gammaproteobacteria as indicator species of healthy banana plants on Fusarium wilt-infested fields in Central America
Source: PubMed Central journal article supplement (PMC5366900; doi:10.1038/srep45318), 2017-03-27
Supplement: srep45318-s1.pdf [file srep45318-s1.pdf]

**Members of *Gammaproteobacteria* as indicator species of healthy banana plants on *Fusarium* wilt-infested fields in Central America**

**Martina Köberl<sup>1</sup>, Miguel Dita<sup>2,3</sup>, Alfonso Martinuz<sup>3</sup>, Charles Staver<sup>4</sup>, Gabriele Berg<sup>1</sup>**

<sup>1</sup>*Graz University of Technology, Institute of Environmental Biotechnology, Austria*

<sup>2</sup>*Brazilian Agricultural Research Corporation – Embrapa, Brasília, Brazil*

<sup>3</sup>*Bioversity International, Turrialba, Costa Rica*

<sup>4</sup>*Bioversity International, Montpellier, France*

**Table S1.** Richness estimates and diversity indices for gammaproteobacterial 16S rRNA gene amplicon libraries at 3%, 5% and 10% genetic dissimilarity.

| Sample <sup>a</sup> | Clusters <sup>b</sup> (OTUs) |     |     | Chao1 (OTUs) |       |     | Coverage (%) |      |      | Shannon (H') |      |      |
|---------------------|------------------------------|-----|-----|--------------|-------|-----|--------------|------|------|--------------|------|------|
|                     | 3%                           | 5%  | 10% | 3%           | 5%    | 10% | 3%           | 5%   | 10%  | 3%           | 5%   | 10%  |
| N-S1-(1)            | 537                          | 367 | 114 | 1,543        | 942   | 216 | 34.8         | 38.9 | 52.8 | 4.30         | 3.25 | 2.26 |
| N-S1-(2)            | 618                          | 420 | 128 | 1,940        | 1,054 | 214 | 31.9         | 39.8 | 59.5 | 4.01         | 3.29 | 2.29 |
| N-S1+(1)            | 710                          | 538 | 146 | 2,570        | 1,574 | 244 | 27.6         | 34.2 | 59.7 | 4.55         | 4.09 | 2.77 |
| N-S1+(2)            | 654                          | 441 | 119 | 2,030        | 1,230 | 221 | 32.2         | 35.9 | 53.7 | 4.12         | 3.09 | 2.04 |
| N-S2-(1)            | 762                          | 541 | 167 | 2,564        | 1,488 | 275 | 29.7         | 36.4 | 60.7 | 5.54         | 4.63 | 3.51 |
| N-S2-(2)            | 694                          | 535 | 172 | 2,301        | 1,443 | 304 | 30.2         | 37.1 | 56.5 | 4.82         | 4.18 | 3.03 |
| N-S2+(1)            | 807                          | 618 | 193 | 2,677        | 1,698 | 310 | 30.1         | 36.4 | 62.1 | 5.59         | 5.06 | 3.57 |
| N-S2+(2)            | 770                          | 561 | 164 | 2,266        | 1,350 | 279 | 34.0         | 41.5 | 58.8 | 5.63         | 4.94 | 3.49 |
| N-S3-(1)            | 896                          | 682 | 199 | 3,081        | 1,869 | 335 | 29.1         | 36.5 | 59.5 | 5.65         | 4.99 | 3.37 |
| N-S3-(2)            | 1195                         | 868 | 223 | 3,773        | 2,234 | 362 | 31.7         | 38.9 | 61.5 | 7.28         | 6.37 | 4.28 |
| N-S3+(1)            | 893                          | 634 | 174 | 3,080        | 1,809 | 298 | 29.0         | 35.1 | 58.5 | 5.47         | 4.60 | 3.04 |
| N-S3+(2)            | 737                          | 533 | 170 | 2,410        | 1,471 | 294 | 30.6         | 36.2 | 57.8 | 4.66         | 3.90 | 2.81 |
| N-Re1-(1)           | 467                          | 303 | 108 | 1,626        | 785   | 203 | 28.7         | 38.6 | 53.1 | 3.39         | 2.57 | 2.08 |
| N-Re1-(2)           | 368                          | 156 | 56  | 800          | 259   | 77  | 46.0         | 60.3 | 72.2 | 5.28         | 3.99 | 3.00 |
| N-Re1+(1)           | 432                          | 183 | 58  | 1,142        | 475   | 102 | 37.8         | 38.6 | 57.2 | 3.73         | 2.11 | 1.56 |
| N-Re1+(2)           | 687                          | 431 | 130 | 1,551        | 907   | 192 | 44.3         | 47.5 | 67.7 | 5.16         | 3.89 | 2.70 |
| N-Re2-(1)           | 523                          | 378 | 121 | 1,008        | 660   | 174 | 51.9         | 57.3 | 69.6 | 4.71         | 3.61 | 2.63 |
| N-Re2-(2)           | 438                          | 335 | 111 | 760          | 510   | 153 | 57.7         | 65.7 | 72.4 | 5.83         | 5.20 | 3.97 |
| N-Re2+(1)           | 195                          | 69  | 23  | 589          | 199   | 47  | 33.0         | 34.8 | 49.4 | 1.80         | 0.94 | 0.79 |
| N-Re2+(2)           | 364                          | 237 | 89  | 838          | 487   | 157 | 43.4         | 48.7 | 56.5 | 3.24         | 2.14 | 1.63 |
| N-Re3-(1)           | 490                          | 357 | 122 | 709          | 497   | 164 | 69.1         | 72.0 | 73.9 | 4.95         | 3.45 | 2.30 |
| N-Re3-(2)           | 197                          | 99  | 43  | 473          | 278   | 84  | 41.6         | 35.6 | 50.7 | 2.10         | 0.75 | 0.52 |
| N-Re3+(1)           | 639                          | 474 | 156 | 1,231        | 916   | 238 | 51.9         | 51.7 | 65.7 | 5.35         | 4.57 | 3.50 |
| N-Re3+(2)           | 281                          | 87  | 27  | 689          | 215   | 69  | 40.7         | 40.3 | 39.0 | 3.20         | 1.70 | 1.12 |
| N-Ps1-(1)           | 58                           | 41  | 11  | 122          | 56    | 14  | 47.2         | 73.4 | 80.7 | 1.55         | 1.41 | 0.51 |
| N-Ps1-(2)           | 148                          | 59  | 24  | 354          | 150   | 42  | 41.8         | 39.6 | 56.8 | 2.21         | 1.29 | 1.13 |
| N-Ps1+(1)           | 205                          | 58  | 12  | 601          | 114   | 20  | 34.2         | 50.8 | 59.9 | 2.81         | 1.77 | 1.52 |
| N-Ps1+(2)           | 322                          | 177 | 65  | 849          | 389   | 115 | 37.9         | 45.6 | 56.0 | 2.96         | 2.21 | 1.82 |
| N-Ps2-(1)           | 238                          | 77  | 24  | 512          | 146   | 31  | 46.5         | 53.0 | 75.1 | 2.90         | 1.82 | 1.66 |
| N-Ps2-(2)           | 231                          | 80  | 20  | 498          | 155   | 35  | 46.4         | 51.6 | 57.1 | 3.02         | 1.59 | 1.13 |
| N-Ps2+(1)           | 195                          | 57  | 15  | 391          | 108   | 27  | 49.8         | 53.0 | 55.4 | 2.74         | 1.41 | 1.13 |
| N-Ps2+(2)           | 221                          | 69  | 17  | 558          | 135   | 28  | 39.6         | 50.8 | 59.6 | 2.56         | 1.99 | 1.05 |
| N-Ps3-(1)           | 248                          | 109 | 37  | 511          | 222   | 51  | 48.5         | 49.3 | 72.4 | 2.98         | 1.68 | 1.30 |
| N-Ps3-(2)           | 217                          | 110 | 40  | 506          | 215   | 65  | 42.9         | 51.4 | 62.2 | 2.77         | 1.98 | 1.53 |
| N-Ps3+(1)           | 265                          | 81  | 18  | 668          | 176   | 35  | 39.6         | 46.1 | 51.0 | 2.88         | 1.50 | 1.10 |
| N-Ps3+(2)           | 251                          | 112 | 39  | 573          | 246   | 69  | 43.8         | 45.4 | 56.5 | 3.09         | 1.96 | 1.45 |
| N-L1-(1)            | 168                          | 72  | 15  | 502          | 128   | 25  | 33.5         | 56.4 | 58.6 | 2.63         | 2.11 | 1.19 |
| N-L1-(2)            | 198                          | 135 | 46  | 601          | 273   | 79  | 33.0         | 49.6 | 58.8 | 2.38         | 2.41 | 1.15 |
| N-L1+(1)            | 120                          | 45  | 20  | 365          | 118   | 32  | 32.7         | 38.1 | 63.2 | 0.84         | 0.42 | 0.34 |
| N-L1+(2)            | 109                          | 50  | 8   | 287          | 102   | 14  | 37.9         | 48.8 | 51.9 | 2.15         | 1.53 | 0.89 |
| N-L2-(1)            | 227                          | 76  | 16  | 534          | 138   | 20  | 42.5         | 55.2 | 80.4 | 2.67         | 1.35 | 1.04 |
| N-L2-(2)            | 217                          | 76  | 28  | 468          | 157   | 43  | 46.3         | 48.5 | 64.9 | 2.64         | 1.33 | 1.01 |
| N-L2+(1)            | 206                          | 57  | 13  | 514          | 106   | 18  | 40.0         | 53.6 | 71.4 | 2.45         | 1.49 | 1.09 |
| N-L2+(2)            | 172                          | 60  | 16  | 433          | 130   | 31  | 39.6         | 46.3 | 51.5 | 2.49         | 1.64 | 1.16 |
| N-L3-(1)            | 284                          | 131 | 43  | 778          | 287   | 67  | 36.5         | 45.8 | 64.3 | 3.50         | 2.31 | 1.95 |
| N-L3-(2)            | 159                          | 54  | 18  | 428          | 134   | 32  | 37.1         | 40.2 | 56.0 | 1.45         | 0.69 | 0.61 |
| N-L3+(1)            | 403                          | 191 | 67  | 1,071        | 416   | 106 | 37.6         | 45.9 | 63.0 | 3.90         | 2.39 | 1.76 |
| N-L3+(2)            | 165                          | 42  | 8   | 333          | 81    | 11  | 49.4         | 51.5 | 66.8 | 2.25         | 1.22 | 1.02 |
| C-S1-(1)            | 209                          | 139 | 52  | 485          | 242   | 83  | 43.1         | 57.6 | 63.1 | 4.86         | 4.74 | 3.75 |
| C-S1-(2)            | 107                          | 83  | 22  | 190          | 119   | 27  | 56.4         | 70.2 | 79.1 | 3.57         | 3.67 | 2.94 |
| C-S1+(1)            | 177                          | 86  | 18  | 389          | 136   | 31  | 45.5         | 63.3 | 58.4 | 2.16         | 2.01 | 1.23 |
| C-S1+(2)            | 26                           | 23  | 5   | 66           | 35    | 6   | 39.4         | 66.0 | 83.1 | 0.72         | 1.20 | 0.76 |
| C-S2-(1)            | 67                           | 44  | 11  | 123          | 60    | 15  | 54.4         | 73.8 | 73.2 | 2.11         | 2.17 | 1.91 |

|           |     |     |     |       |       |     |      |      |      |      |      |      |
|-----------|-----|-----|-----|-------|-------|-----|------|------|------|------|------|------|
| C-S2-(2)  | 413 | 241 | 74  | 836   | 387   | 102 | 49.4 | 62.2 | 72.8 | 5.22 | 4.81 | 4.30 |
| C-S2+(1)  | 95  | 39  | 10  | 197   | 77    | 19  | 48.1 | 50.6 | 51.6 | 1.95 | 2.01 | 1.54 |
| C-S2+(2)  | 37  | 21  | 3   | 65    | 26    | 4   | 56.5 | 81.5 | 84.6 | 1.24 | 1.22 | 0.01 |
| C-S3-(1)  | 186 | 141 | 29  | 363   | 247   | 45  | 51.4 | 56.9 | 65.6 | 3.89 | 3.89 | 3.38 |
| C-S3-(2)  | 413 | 363 | 123 | 1,127 | 781   | 180 | 36.6 | 46.4 | 68.3 | 6.75 | 6.61 | 4.58 |
| C-S3+(1)  | 157 | 103 | 48  | 304   | 178   | 71  | 51.8 | 57.9 | 67.5 | 4.37 | 4.27 | 3.18 |
| C-S3+(2)  | 107 | 22  | 7   | 215   | 31    | 8   | 49.8 | 70.5 | 82.2 | 2.79 | 2.48 | 1.18 |
| C-Re1-(1) | 405 | 285 | 105 | 682   | 416   | 134 | 59.4 | 68.4 | 78.2 | 6.57 | 5.62 | 3.91 |
| C-Re1-(2) | 311 | 246 | 90  | 503   | 373   | 118 | 61.8 | 65.8 | 76.4 | 4.06 | 3.75 | 2.50 |
| C-Re1+(1) | 793 | 585 | 161 | 1,874 | 1,119 | 217 | 42.3 | 52.3 | 74.1 | 7.26 | 6.79 | 3.95 |
| C-Re1+(2) | 871 | 639 | 196 | 2,062 | 1,327 | 282 | 42.2 | 48.2 | 69.5 | 7.16 | 6.36 | 4.69 |
| C-Re2-(1) | 533 | 398 | 147 | 1,073 | 763   | 208 | 49.7 | 52.1 | 70.9 | 6.53 | 5.87 | 4.33 |
| C-Re2-(2) | 496 | 361 | 124 | 1,177 | 708   | 210 | 42.2 | 51.0 | 58.8 | 5.85 | 4.85 | 3.79 |
| C-Re2+(1) | 751 | 597 | 211 | 1,540 | 1,080 | 311 | 48.7 | 55.3 | 67.6 | 7.35 | 6.84 | 5.02 |
| C-Re2+(2) | 548 | 355 | 119 | 1,181 | 687   | 194 | 46.4 | 51.7 | 61.5 | 5.00 | 3.76 | 2.90 |
| C-Re3-(1) | 555 | 373 | 123 | 1,251 | 708   | 177 | 44.3 | 52.8 | 69.6 | 5.48 | 4.65 | 3.45 |
| C-Re3-(2) | 838 | 665 | 207 | 1,797 | 1,283 | 313 | 46.6 | 51.8 | 66.2 | 7.32 | 6.67 | 4.84 |
| C-Re3+(1) | 358 | 218 | 83  | 781   | 425   | 132 | 45.9 | 51.4 | 62.9 | 2.91 | 1.90 | 1.28 |
| C-Re3+(2) | 231 | 116 | 46  | 407   | 146   | 56  | 56.6 | 79.2 | 81.3 | 3.21 | 2.39 | 1.60 |
| C-Ps1-(1) | 107 | 35  | 15  | 230   | 76    | 25  | 46.3 | 46.6 | 60.2 | 3.53 | 2.42 | 2.15 |
| C-Ps1-(2) | 108 | 28  | 8   | 184   | 44    | 10  | 58.8 | 64.2 | 78.2 | 1.94 | 1.82 | 1.21 |
| C-Ps1+(1) | 116 | 30  | 9   | 243   | 50    | 12  | 47.8 | 59.8 | 80.5 | 2.06 | 1.77 | 0.58 |
| C-Ps1+(2) | 157 | 56  | 7   | 294   | 70    | 9   | 53.3 | 79.3 | 75.6 | 3.33 | 2.83 | 0.99 |
| C-Ps2-(1) | 262 | 79  | 12  | 585   | 130   | 17  | 44.8 | 61.2 | 71.8 | 2.92 | 1.95 | 1.35 |
| C-Ps2-(2) | 410 | 114 | 24  | 909   | 210   | 34  | 45.1 | 54.1 | 70.3 | 3.69 | 1.92 | 1.34 |
| C-Ps2+(1) | 135 | 48  | 11  | 280   | 68    | 17  | 48.4 | 70.5 | 62.9 | 2.93 | 2.68 | 1.33 |
| C-Ps2+(2) | 210 | 64  | 10  | 448   | 99    | 17  | 46.9 | 64.4 | 61.4 | 3.54 | 2.39 | 1.10 |
| C-Ps3-(1) | 264 | 68  | 16  | 494   | 120   | 23  | 53.5 | 56.1 | 68.1 | 3.30 | 1.85 | 1.39 |
| C-Ps3-(2) | 132 | 84  | 21  | 279   | 122   | 36  | 47.4 | 69.0 | 56.7 | 3.00 | 3.19 | 2.08 |
| C-Ps3+(1) | 150 | 52  | 13  | 270   | 58    | 13  | 55.5 | 89.2 | 97.5 | 2.64 | 1.58 | 0.91 |
| C-Ps3+(2) | 138 | 23  | 8   | 242   | 72    | 11  | 56.8 | 32.5 | 75.5 | 1.89 | 0.31 | 0.10 |
| C-L1-(1)  | 246 | 100 | 22  | 543   | 200   | 34  | 45.3 | 50.1 | 65.1 | 4.17 | 3.03 | 2.38 |
| C-L1-(2)  | 236 | 82  | 17  | 596   | 158   | 22  | 39.6 | 52.1 | 74.6 | 3.61 | 3.02 | 2.26 |
| C-L1+(1)  | 109 | 30  | 12  | 225   | 51    | 14  | 48.6 | 58.2 | 85.0 | 0.97 | 0.38 | 0.39 |
| C-L1+(2)  | 39  | 21  | 14  | 106   | 45    | 25  | 36.5 | 45.9 | 58.7 | 0.26 | 0.18 | 0.16 |
| C-L2-(1)  | 167 | 21  | 12  | 250   | 59    | 17  | 66.6 | 35.3 | 70.8 | 1.48 | 0.26 | 0.24 |
| C-L2-(2)  | 175 | 58  | 16  | 404   | 92    | 25  | 43.2 | 62.8 | 64.3 | 3.56 | 2.55 | 2.15 |
| C-L2+(1)  | 215 | 57  | 11  | 497   | 136   | 12  | 43.3 | 41.5 | 90.1 | 3.53 | 2.45 | 1.96 |
| C-L2+(2)  | 425 | 147 | 43  | 973   | 278   | 59  | 43.7 | 52.9 | 73.5 | 4.42 | 2.82 | 2.17 |
| C-L3-(1)  | 228 | 92  | 22  | 474   | 157   | 36  | 48.1 | 58.8 | 60.2 | 4.08 | 3.30 | 2.43 |
| C-L3-(2)  | 190 | 81  | 23  | 348   | 135   | 32  | 54.5 | 59.8 | 70.4 | 3.09 | 2.60 | 1.09 |
| C-L3+(1)  | 56  | 28  | 10  | 137   | 43    | 11  | 40.8 | 64.0 | 92.2 | 1.08 | 0.99 | 0.77 |
| C-L3+(2)  | 119 | 50  | 29  | 338   | 96    | 44  | 35.3 | 52.2 | 66.4 | 3.19 | 2.73 | 2.43 |

<sup>a</sup>Sample abbreviations indicate: (1) country (N- = Nicaragua, C- = Costa Rica), (2) microenvironment (S = rhizosphere soil, Re = endorhiza, Ps = pseudostem, L = leaves), (3) farm (1, 2, 3), (4) infestation with *Fusarium oxysporum* f. sp. *cubense* (- = healthy, + = infested), and (5) independent replicate sample (1, 2).

<sup>b</sup>averaged rarefaction curves are depicted in Fig. S1.

**Table S2.** Statistical comparisons of the gammaproteobacterial communities between healthy and FOC-infested banana plants.

|                    | Nicaragua | Costa Rica | Together |
|--------------------|-----------|------------|----------|
| <b>Rhizosphere</b> | 0.234     | 0.090      | 0.138    |
| <b>Endorhiza</b>   | 0.825     | 0.645      | 0.652    |
| <b>Pseudostem</b>  | 0.349     | 0.813      | 0.788    |
| <b>Leaves</b>      | 0.838     | 0.255      | 0.319    |

p values of individual microenvironments for pairwise comparisons between healthy and infested plants ascertained by adonis test based on jackknifed weighted UniFrac distances.

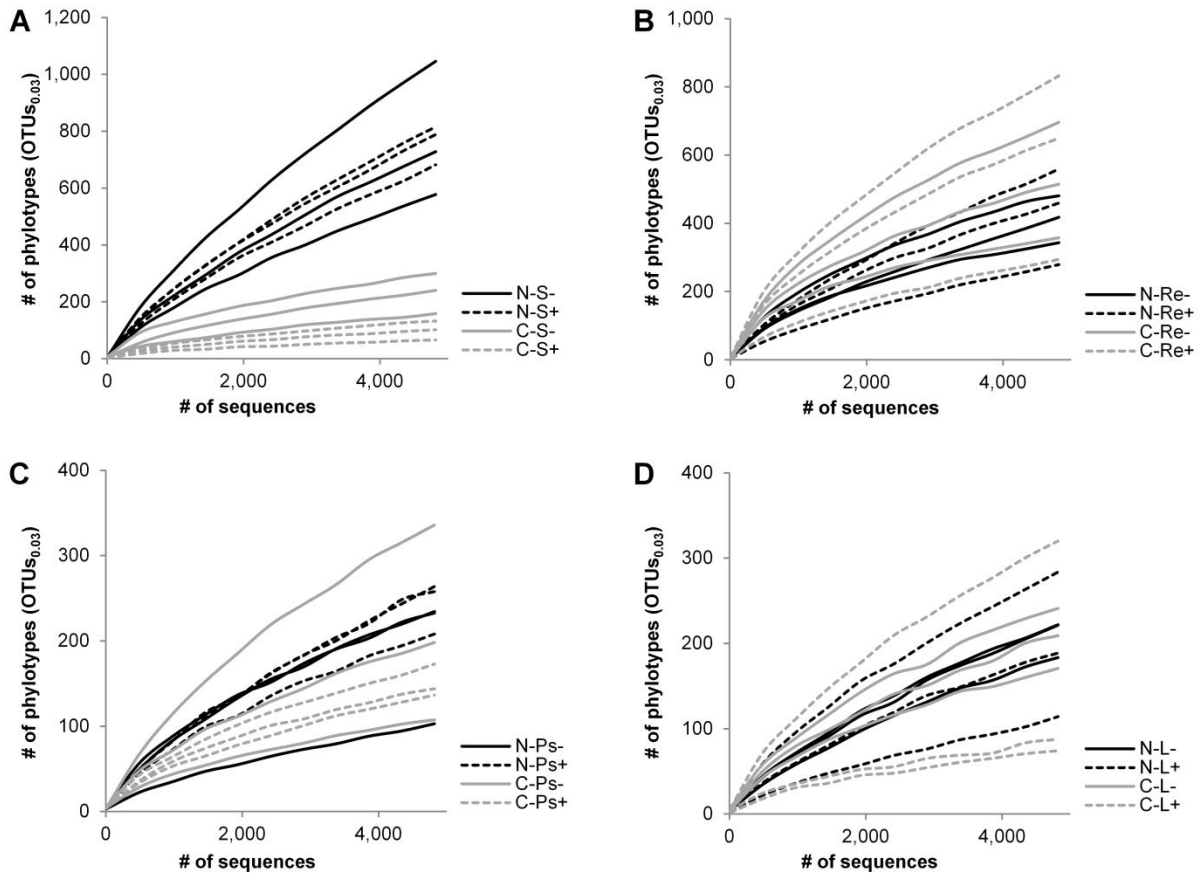

**Figure S1.** Rarefaction analysis of averaged *Gammaproteobacteria*-specific 16S rRNA gene sequence libraries at a dissimilarity level of 3% divided into rhizosphere soil (A), endorhiza (B), pseudostem (C), and foliage samples (D) and separated into samples from individual farms. N- = Nicaragua, C- = Costa Rica; S = rhizosphere soil, Re = endorhiza, Ps = pseudostem, L = leaves; - = healthy, + = *Fusarium* wilt-infested.

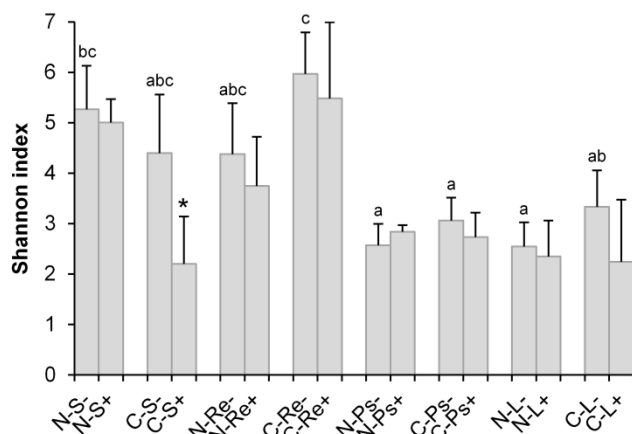

**Figure S2.** Shannon indices of gammaproteobacterial diversity for different banana-associated microenvironments divided into healthy and *Fusarium* wilt-infested state at a genetic distance of 3%, separated in samples from Nicaragua and Costa Rica. Data were ascertained by 16S rRNA gene profiling and are averages of the three sampling farms of a country  $\pm$  confidence. N- = Nicaragua, C- = Costa Rica; S = rhizosphere soil, Re = endorhiza, Ps = pseudostem, L = leaves; - = healthy, + = infested. Significant differences ( $p \leq 0.05$ , Tukey-HSD post hoc test) between the microenvironments of asymptomatic plants are indicated by lowercase letters. Asterisks show significant differences ( $p \leq 0.05$ , independent samples *t*-test) between the healthy and infested state of the plant.

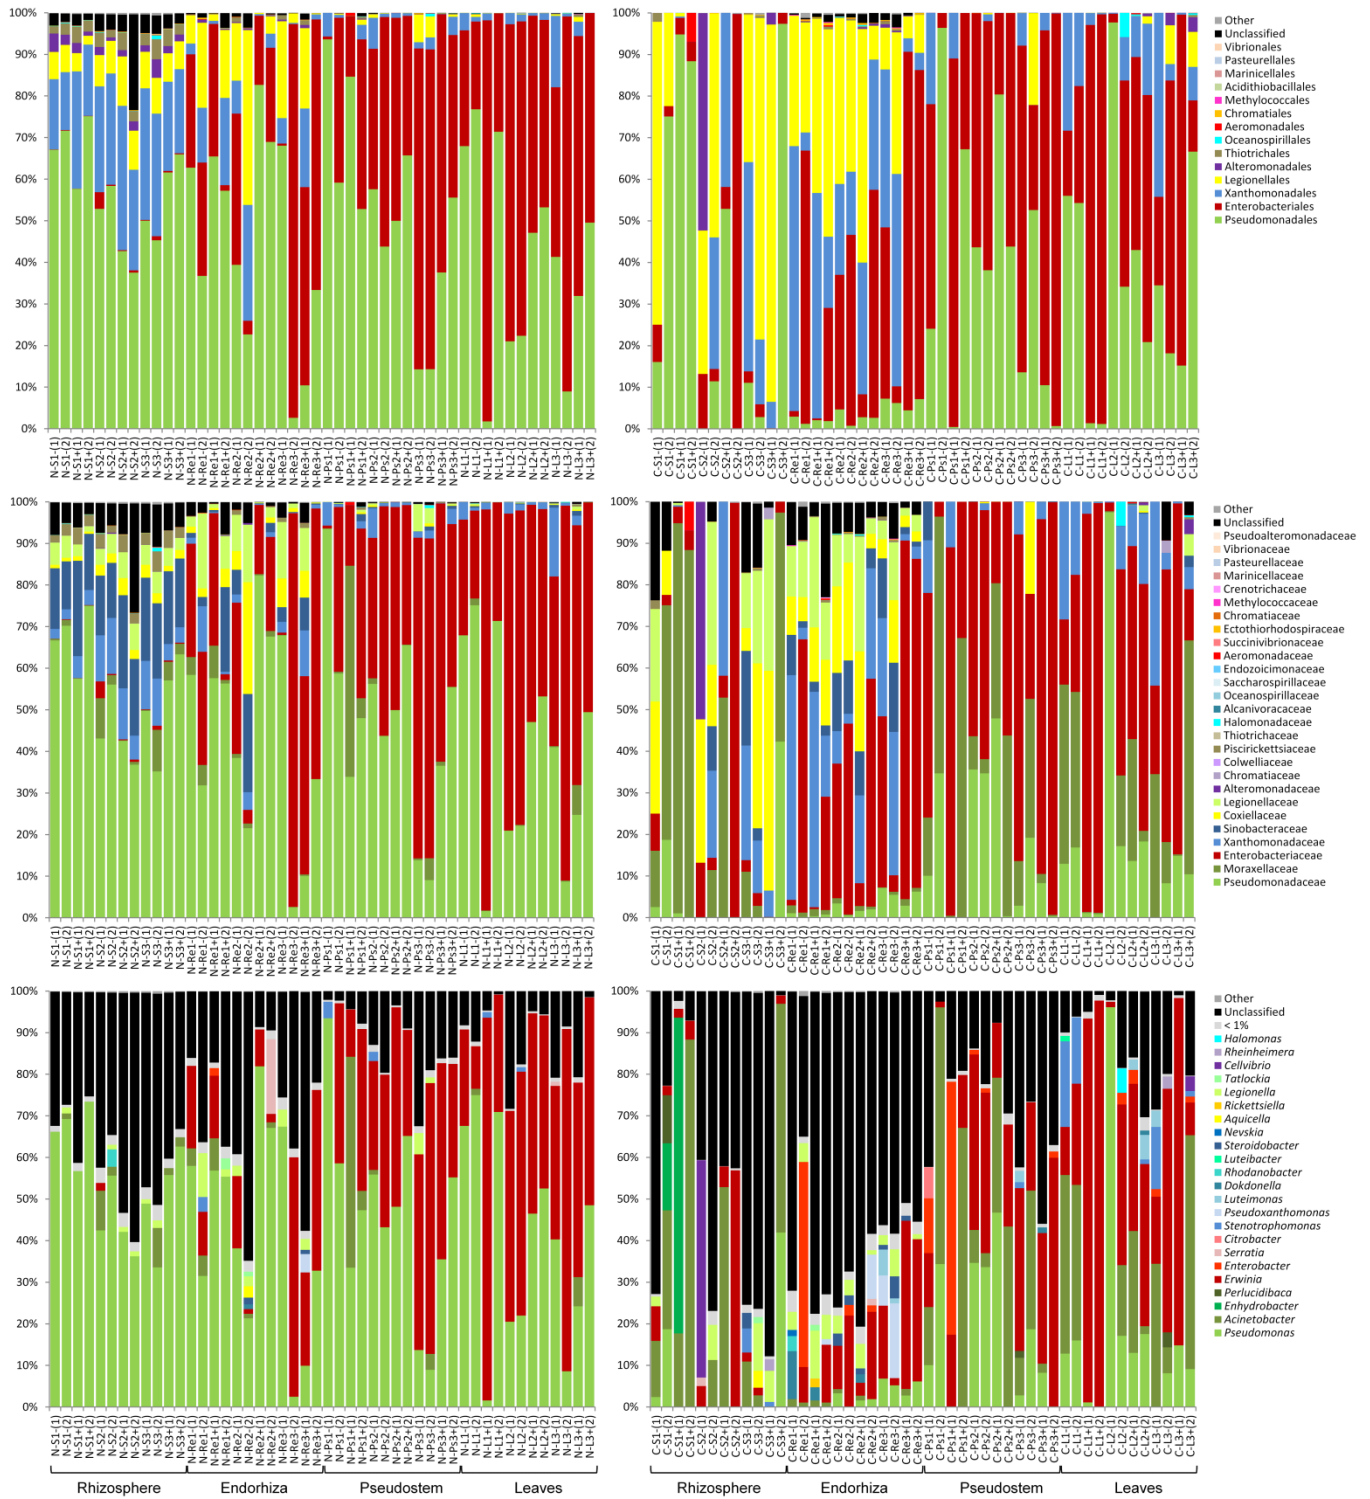

**Figure S3.** Taxonomic composition of *Gammaproteobacteria* communities inhabiting rhizosphere, endorhiza, pseudostem, and leaves of healthy and *Fusarium* wilt-infested banana plants grown in Nicaragua (left) and Costa Rica (right). Sequences obtained by Illumina MiSeq sequencing were classified at order, family and genus level. Samples were encoded using abbreviations indicating: (1) country (N- = Nicaragua, C- = Costa Rica), (2) microenvironment (S = rhizosphere soil, Re = endorhiza, Ps = pseudostem, L = leaves), (3) farm (1, 2, 3), (4) infestation with *Fusarium oxysporum* f. sp. *cubeense* (- = healthy, + = infested), and (5) independent replicate sample (1, 2).
